# Supplementary material
Source: HighWire-hosted journal article supplement (https://bjsm.bmj.com/content/56/19/1132)
Supplement: inline-supplementary-material-1 [file inline-supplementary-material-1.pdf]

**Appendix 1. Factors associated with lumbar spine OA in Olympians and general population control.**

|                         | Olympians           |                                     | Controls            |                                     |
|-------------------------|---------------------|-------------------------------------|---------------------|-------------------------------------|
|                         | Prevalence<br>n (%) | aOR (95% CI)<br>adjusted a, s, b, i | Prevalence<br>n (%) | aOR (95% CI)<br>adjusted a, s, b, i |
| <b>Age</b>              |                     |                                     |                     |                                     |
| 20-39                   | 35/1194 (2.93)      | 1.00 (reference)                    | 10/776 (1.28)       | 1.00 (reference)                    |
| 40-59                   | 89/1359 (6.55)      | <b>2.32 (1.53 to 3.52)</b>          | 32/646 (4.95)       | <b>4.31 (2.03 to 9.15)</b>          |
| >60                     | 52/580 (8.97)       | <b>4.10 (2.54 to 6.63)</b>          | 23/212 (10.84)      | <b>12.43 (5.59 to 27.7)</b>         |
| <b>Sex</b>              |                     |                                     |                     |                                     |
| male                    | 90/1840 (4.89)      | 1.00 (reference)                    | 20/723 (2.76)       | 1.00 (reference)                    |
| female                  | 100/1488 (6.72)     | <b>1.91 (1.36 to 2.70)</b>          | 46/998 (4.61)       | <b>2.28 (1.29 to 4.05)</b>          |
| <b>BMI</b>              |                     |                                     |                     |                                     |
| normal                  | 86/1774 (4.85)      | 1.00 (reference)                    | 36/981 (3.67)       | 1.00 (reference)                    |
| overweight              | 69/1063 (6.49)      | <b>1.61 (1.11 to 2.32)</b>          | 19/457 (4.16)       | 0.96 (0.52 to 1.75)                 |
| obese                   | 25/342 (7.31)       | 1.53 (0.91 to 2.59)                 | 10/190 (5.26)       | 1.35 (0.64 to 2.86)                 |
| <b>Lspine injury</b>    |                     |                                     |                     |                                     |
| no                      | 102/2815 (3.62)     | 1.00 (reference)                    | 51/1576 (3.24)      | 1.00 (reference)                    |
| yes                     | 89/542 (16.42)      | <b>5.59 (4.01 to 7.78)</b>          | 15/159 (9.43)       | <b>3.52 (1.87 to 6.65)</b>          |
| Lspine recurrent injury | 78/355 (21.97)      | <b>3.54 (1.85 to 6.81)</b>          | 17/99 (17.17)       | <b>14.75 (1.72 to 126.8)</b>        |
| <b>Comorbidities</b>    |                     |                                     |                     |                                     |
| none                    | 80/2379 (3.36)      | 1.00 (reference)                    | 33/1263 (2.61)      | 1.00 (reference)                    |
| 1                       | 64/696 (9.20)       | 2.57 (1.76 to 3.75)                 | 20/336 (5.95)       | 1.74 (0.95 to 3.17)                 |
| 2 or more               | 47/282 (16.67)      | <b>4.01 (2.57 to 6.27)</b>          | 13/136 (9.56)       | 1.87 (0.878 to 3.98)                |

(Values are presented as count (n) and prevalence (%). aOR adjusted a, s, b, i = odds ratio adjusted for confounders age, sex, BMI and injury. BMI = body mass index. Lspine = Lumbar spine. Bold denotes statistical significance.)
