# Supplementary material
Source: HighWire-hosted journal article supplement (https://bjsm.bmj.com/content/56/19/1132)
Supplement: inline-supplementary-material-4 [file inline-supplementary-material-4.pdf]

**Appendix 4. Factors associated with lumbar spine pain in Olympians and general population control.**

|                         | Olympians           |                                     | Controls            |                                     |
|-------------------------|---------------------|-------------------------------------|---------------------|-------------------------------------|
|                         | Prevalence<br>n (%) | aOR (95% CI)<br>adjusted a, s, b, i | Prevalence<br>n (%) | aOR (95% CI)<br>adjusted a, s, b, i |
| <b>Age</b>              |                     |                                     |                     |                                     |
| 20-39                   | 234/1194 (19.6)     | 1.00 (reference)                    | 83/776 (10.7)       | 1.00 (reference)                    |
| 40-59                   | 293/1359 (21.56)    | 1.09 (0.88 to 1.34)                 | 86/646 (13.31)      | 1.24 (0.88 to 1.73)                 |
| >60                     | 83/580 (14.31)      | <b>0.56 (0.41 to 0.77)</b>          | 32/212 (15.09)      | <b>1.70 (1.07 to 2.70)</b>          |
| <b>Sex</b>              |                     |                                     |                     |                                     |
| male                    | 358/1840 (19.46)    | 1.00 (reference)                    | 99/723 (13.69)      | 1.00 (reference)                    |
| female                  | 285/1488 (19.15)    | 0.94 (0.77 to 1.15)                 | 114/998 (11.42)     | 0.79 (0.59 to 1.08)                 |
| <b>BMI</b>              |                     |                                     |                     |                                     |
| normal                  | 315/1774 (17.76)    | 1.00 (reference)                    | 107/981 (10.91)     | 1.00 (reference)                    |
| overweight              | 214/1063 (20.13)    | 1.24 (1.00 to 1.55)                 | 73/457 (15.97)      | <b>1.46 (1.04 to 2.06)</b>          |
| obese                   | 76/342 (22.22)      | <b>1.40 (1.02 to 1.92)</b>          | 21/190 (11.05)      | 1.06 (0.63 to 1.77)                 |
| <b>Lspine injury</b>    |                     |                                     |                     |                                     |
| no                      | 400/2815 (14.21)    | 1.00 (reference)                    | 157/1576 (9.96)     | 1.00 (reference)                    |
| yes                     | 248/542 (45.76)     | <b>4.90 (3.97 to 6.05)</b>          | 57/159 (35.85)      | <b>5.07 (3.48 to 7.39)</b>          |
| Lspine recurrent injury | 196/355 (55.21)     | <b>3.31 (2.21 to 4.96)</b>          | 45/99 (45.45)       | <b>3.12 (1.44 to 6.75)</b>          |
| <b>Comorbidities</b>    |                     |                                     |                     |                                     |
| none                    | 377/2379 (15.85)    | 1.00 (reference)                    | 124/1263 (9.82)     | 1.00 (reference)                    |
| 1                       | 185/696 (26.58)     | 2.09 (1.67 to 2.62)                 | 56/336 (16.67)      | 1.96 (1.36 to 2.83)                 |
| 2 or more               | 86/282 (30.5)       | <b>2.23 (1.61 to 3.10)</b>          | 34/136 (25)         | <b>3.40 (2.11 to 5.50)</b>          |

(Values are presented as count (n) and prevalence (%). aOR adjusted a, s, b, i = odds ratio adjusted for confounders age, sex, BMI and injury. BMI = body mass index. Lspine = Lumbar spine. Bold denotes statistical significance.)
