# Supplementary material
Source: HighWire-hosted journal article supplement (https://bjsm.bmj.com/content/56/19/1132)
Supplement: inline-supplementary-material-5 [file inline-supplementary-material-5.pdf]

**Appendix 5. Factors associated with cervical spine pain in Olympians and general population control.**

|                      | Olympians           |                                     | Controls            |                                     |
|----------------------|---------------------|-------------------------------------|---------------------|-------------------------------------|
|                      | Prevalence<br>n (%) | aOR (95% CI)<br>adjusted a, s, b, i | Prevalence<br>n (%) | aOR (95% CI)<br>adjusted a, s, b, i |
| <b>Age</b>           |                     |                                     |                     |                                     |
| 20-39                | 81/1194 (6.78)      | 1.00 (reference)                    | 43/776 (5.54)       | 1.00 (reference)                    |
| 40-59                | 103/1359 (7.58)     | 1.05 (0.765 to 1.46)                | 41/646 (6.35)       | 1.17 (0.73 to 1.86)                 |
| >60                  | 34/580 (5.86)       | 0.84 (0.53 to 1.33)                 | 9/212 (4.25)        | 0.71 (0.31 to 1.61)                 |
| <b>Sex</b>           |                     |                                     |                     |                                     |
| male                 | 9/1840 (5.38)       | 1.00 (reference)                    | 30/723 (4.15)       | 1.00 (reference)                    |
| female               | 130/1488 (8.74)     | <b>1.61 (1.17 to 2.21)</b>          | 67/998 (6.71)       | 1.48 (0.92 to 2.38)                 |
| <b>BMI</b>           |                     |                                     |                     |                                     |
| normal               | 129/1774 (7.27)     | 1.00 (reference)                    | 56/981 (5.71)       | 1.00 (reference)                    |
| overweight           | 65/1063 (6.11)      | 1.02 (0.72 to 1.45)                 | 22/457 (4.81)       | 0.92 (0.54 to 1.57)                 |
| obese                | 26/342 (7.60)       | 1.25 (0.77 to 2.04)                 | 9/190 (4.74)        | 0.66 (0.30 to 1.44)                 |
| <b>Cspine injury</b> |                     |                                     |                     |                                     |
| no                   | 178/3209 (5.55)     | 1.00 (reference)                    | 85/1683 (5.05)      | 1.00 (reference)                    |
| yes                  | 54/148 (36.49)      | <b>9.41 (6.32 to 14.01)</b>         | 12/52 (23.08)       | <b>6.43 (3.10 to 13.31)</b>         |
| <b>Comorbidities</b> |                     |                                     |                     |                                     |
| none                 | 129/1774 (7.27)     | 1.00 (reference)                    | 60/1263 (4.75)      | 1.00 (reference)                    |
| 1                    | 65/1063 (6.11)      | <b>1.95 (1.38 to 2.73)</b>          | 22/336 (6.55)       | 1.57 (0.92 to 2.68)                 |
| 2 or more            | 26/342 (7.60)       | <b>2.63 (1.64 to 4.22)</b>          | 15/136 (11.03)      | <b>2.60 (1.33 to 5.12)</b>          |

(Values are presented as count (n) and prevalence (%). aOR adjusted a, s, b, i = odds ratio adjusted for confounders age, sex, BMI and injury. BMI = body mass index. Cspine = cervical spine. Bold denotes statistical significance.)
