# Supplementary material
Source: HighWire-hosted journal article supplement (https://bjsm.bmj.com/content/56/19/1132)
Supplement: inline-supplementary-material-6 [file inline-supplementary-material-6.pdf]

**Appendix 6. Factors associated with shoulder pain in Olympians and general population control.**

|                           | Olympians           |                                     | Controls            |                                     |
|---------------------------|---------------------|-------------------------------------|---------------------|-------------------------------------|
|                           | Prevalence<br>n (%) | aOR (95% CI)<br>adjusted a, s, b, i | Prevalence<br>n (%) | aOR (95% CI)<br>adjusted a, s, b, i |
| <b>Age</b>                |                     |                                     |                     |                                     |
| 20-39                     | 84/1194 (7.04)      | 1.00                                | 54/776 (6.96)       | 1.00                                |
| 40-59                     | 113/1359 (8.31)     | 1.20 (0.88 to 1.63)                 | 65/646 (10.06)      | 1.46 (0.99 to 2.17)                 |
| >60                       | 37/580 (6.38)       | 0.96 (0.62 to 1.49)                 | 17/212 (8.02)       | 1.09 (0.59 to 2.02)                 |
| <b>Sex</b>                |                     |                                     |                     |                                     |
| male                      | 124/1840 (6.74)     | 1.00                                | 61/723 (8.44)       | 1.00                                |
| female                    | 121/1488 (8.13)     | 1.25 (0.93 to 1.68)                 | 81/998 (8.12)       | 1.00 (0.99 to 1.02)                 |
| <b>BMI</b>                |                     |                                     |                     |                                     |
| normal                    | 121/1774 (6.82)     | 1.00                                | 84/981 (8.56)       | 1.00                                |
| overweight                | 77/1063 (7.24)      | 1.12 (0.81 to 1.57)                 | 32/457 (7.00)       | 0.79 (0.51 to 1.24)                 |
| obese                     | 37/342 (10.82)      | <b>1.73 (1.12 to 2.68)</b>          | 17/190 (8.95)       | 1.24 (0.70 to 2.18)                 |
| <b>Injury</b>             |                     |                                     |                     |                                     |
| no                        | 126/2827 (4.46)     | 1.00                                | 86/1513 (5.68)      | 1.00                                |
| yes                       | 120/530 (22.64)     | <b>6.04 (4.55 to 8.03)</b>          | 56/222 (25.23)      | <b>5.36 (3.64 to 7.88)</b>          |
| Shoulder recurrent injury | 84/259 (32.43)      | <b>2.56 (1.64 to 3.98)</b>          | 34/98 (34.69)       | <b>2.25 (1.18 to 4.31)</b>          |
| <b>Comorbidities</b>      |                     |                                     |                     |                                     |
| none                      | 136/2379 (5.72)     | 1.00                                | 88/1263 (6.97)      | 1.00                                |
| 1                         | 74/696 (10.63)      | <b>1.77 (1.28 to 2.45)</b>          | 33/336 (9.82)       | 1.53 (0.97 to 2.39)                 |
| 2 or more                 | 36/282 (12.77)      | <b>2.16 (1.38 to 3.37)</b>          | 21/136 (15.44)      | <b>2.94 (1.67 to 5.19)</b>          |

(Values are presented as count (n) and prevalence (%). aOR adjusted a, s, b, i = odds ratio adjusted for confounders age, sex, BMI and injury. BMI = body mass index. Bold denotes statistical significance.)
